# Supplementary material for: Use of estimated glomerular filtration rate to predict incident chronic kidney disease in patients at risk of cardiovascular disease: a retrospective study
Source: BMC Nephrol. 2019 Aug 20;20:325. doi: 10.1186/s12882-019-1494-8 (PMC6700777; doi:10.1186/s12882-019-1494-8)
Supplement: Supplementary file 2 — Use of estimated glomerular filtration rate to predict incident chronic kidney disease in patients at risk of cardiovascular disease: a retrospective study dataset. ID identification, DM diabetes mellitus, HbA1c glycosylated hemoglobin A1C, CVD cardiovascular disease, HTN hypertension, SBP systolic blood pressure, DBP diastolic blood pressure, BMI body mass index, eGFR estimated glomerular filtration rate, CKD chronic kidney disease. (XLSX 54 kb) [file 12882_2019_1494_MOESM2_ESM.xlsx]

## Sheet: Dataset
ID	Sex	DM	CVD	Smoking	HTN	Dyslipidemia	HbA1C	SBPBaseline	DBPBaseline	CholesterolBaseline	TriglyceridesBaseleine	BMIBaseline	CreatnineBaseline	Time(months)	EventCKD
1	0	0	0	0	1	1	5.9	144	87	4.8	0.92	40.2	59	98	0
2	0	0	0	0	1	0	6	148	91	6.4	1.84	44.5	52	106	0
3	0	0	0	0	1	1	5.9	149	86	6.4	1.75	40.5	57	88	0
4	0	0	0	0	0	1	5.5	116	68	5.1	1.22	32	65	103	0
5	0	1	0	0	1	1	7.46	132	63	5	1.11	30.8	70	105	0
6	0	0	0	0	1	1	6.2	124	84	4.9	0.94	36.8	57	105	0
7	0	0	0	0	1	0	6.5	125	72	5.6	6.19	35.8	59	98	0
8	0	0	0	0	0	0	5.8	120	77	6.6	3.9	44.1	69	93	0
9	0	0	0	0	0	1	6	123	79	5	0.57	39.7	63	88	0
10	0	0	0	0	1	1	6.9	157	87	5.7	0.52	35.6	54	103	0
11	0	0	0	0	1	1	6.2	112	64	6.8	3.06	35.8	49	105	0
12	1	0	0	1	0	0	5.1	121	78	4.6	2.51	25.3	90	105	0
13	0	0	0	0	1	0	5.7	129	72	4.3	0.93	29.9	64	104	0
14	1	0	0	0	1	1	6.4	132	57	5.8	1.44	27.3	95	102	0
15	0	0	0	0	1	1	5.7	148	70	5.5	1.46	23.4	53	100	0
16	1	0	0	0	1	0	6.6	137	76	6.4	2.68	22.9	78	96	0
17	0	1	0	0	1	0	6.6	140	80	3.2	1.92	39.8	61	94	0
18	1	0	0	0	1	0	6.9	143	89	7.7	1.3	28.2	77	100	0
19	0	1	0	0	0	1	7.7	131	80	3.4	1.08	19.5	46	101	0
21	0	0	0	0	0	1	6.3	137	76	4.1	1.11	32.1	59	93	0
22	0	1	0	0	1	1	7.1	146	74	5.3	0.76	33.3	57	81	1
23	0	1	0	0	1	1	9.6	125	68	4.7	1.32	33.7	69	47	1
24	0	0	0	0	0	0	6	138	95	5	0.92	35.6	37	102	0
25	0	0	0	0	0	1	6.6	143	80	5	0.79	41.1	51	88	0
26	1	0	0	1	0	0	5.4	109	82	6.9	0.6	24.4	73	94	0
27	1	0	1	0	0	0	5.3	131	81	8.2	1.18	24	104	99	0
28	1	0	0	1	1	0	5	160	103	5.8	0.67	26.4	66	97	0
29	0	0	0	0	0	0	5.7	126	68	6.5	0.77	42	72	63	0
30	1	0	0	0	0	0	7.3	145	85	5.2	1.6	32.9	94	88	1
31	0	1	0	0	1	1	6.57	128	72	3.9	0.55	25.1	59	100	0
33	0	0	0	0	1	0	5.9	150	85	4.7	1.14	36.2	45	95	0
34	1	0	0	0	1	1	6.5	137	81	4	1.71	25.4	74	97	0
36	0	0	0	0	1	1	6.6	133	72	5.6	0.4	31	54	99	0
37	0	0	0	0	0	0	6.2	121	78	5.1	2.88	30.1	76	93	0
38	0	0	0	0	1	1	6.3	133	73	4.7	0.68	29.1	35	104	0
39	0	0	0	0	0	0	6	160	80	6.6	1.7	33.9	58	96	0
40	0	0	0	0	0	0	5.4	124	82	6	0.88	25	62	102	0
41	0	0	0	0	1	1	6.8	121	76	7.8	1.46	27.3	59	77	0
42	0	0	0	0	0	0	5.6	124	86	4.9	0.94	38.3	69	97	0
43	0	0	0	0	1	1	6.1	111	61	4.6	1.06	26.3	59	93	0
44	1	1	0	0	1	1	6.4	124	84	4.7	1.76	27.2	67	89	0
45	1	0	0	0	1	1	5.8	139	76	5.4	2.62	27	60	98	0
46	0	1	0	0	0	1	7.4	111	64	6.2	0.78	38.1	55	66	0
47	0	0	0	0	1	1	5.9	127	79	5.2	3.08	25.4	54	89	0
48	0	0	0	0	1	1	5.1	104	68	5.8	1.23	30.8	60	99	0
50	0	0	0	0	1	1	5.46	113	73	6.1	1.72	27.2	54	105	0
51	0	0	0	0	1	1	5.8	140	82	7.5	1.89	38.4	46	93	0
52	1	0	1	1	1	1	5.7	144	80	6.1	2.19	29.9	65	101	0
53	1	0	0	0	1	1	6.4	133	74	6.8	3.38	32.7	123	85	0
54	1	0	0	0	0	1	6	135	94	4.6	1.03	32.1	79	97	0
55	0	0	0	0	1	1	6.2	161	89	7.3	1.84	46.9	62	95	0
57	0	0	0	0	1	0	6.4	141	89	5.2	0.18	36.8	61	103	0
58	1	0	0	0	1	1	7.2	120	81	4.5	3.47	30.5	77	97	0
59	0	0	0	0	1	1	6.2	144	75	3.7	0.79	40.1	72	98	0
60	0	1	0	0	0	1	6.9	129	82	4.5	1.19	51	48	65	0
61	1	0	0	1	1	0	5.6	166	92	5.8	1.45	18.1	108	72	1
62	0	0	0	0	0	0	7	145	80	4	1.17	33.8	41	99	0
63	0	0	0	0	1	1	6.5	106	68	5.1	1.1	39.3	57	100	0
64	0	0	0	0	0	1	6.6	116	64	5.5	0.85	27.4	68	108	0
65	1	0	1	0	0	0	5.2	133	80	3.7	1.25	22.9	55	82	0
66	1	0	0	0	1	1	5.9	137	75	4.7	1.27	25.4	66	103	0
67	0	0	0	0	0	0	6.1	110	69	4.4	4.16	42.7	35	93	0
68	0	0	0	0	1	0	5.6	150	92	4.3	0.98	30.3	46	96	0
69	1	0	0	0	1	0	6.1	143	75	3.2	1.08	30.4	74	86	0
70	0	0	0	0	0	0	5.7	95	45	6.3	1.03	29.8	46	96	0
71	0	0	0	0	1	1	5.71	141	90	5.4	1.73	37.7	56	88	0
72	1	1	0	0	1	1	6.2	137	91	3.3	1.77	33.7	69	67	0
73	0	1	0	0	1	1	9.6	114	69	4.1	1.65	29	69	37	1
74	1	0	0	0	0	1	6.5	145	85	5	2.75	32.9	90	100	0
75	1	1	1	1	1	1	12.9	142	64	3.3	1.64	28.1	85	87	1
76	1	0	0	0	0	1	6.2	129	74	3.8	0.79	30.4	80	64	0
77	1	0	0	0	1	1	6.1	122	72	5.7	1.11	29.7	76	101	0
78	1	1	0	0	0	1	7.9	124	84	3.7	0.72	26	66	104	0
79	1	0	0	1	1	0	6.1	176	90	5.7	1.69	27.6	78	26	0
80	1	0	0	1	0	0	6.7	118	75	6.2	1.21	23.9	64	96	0
81	1	0	0	0	1	1	6.2	115	75	4.9	0.73	28.9	100	100	0
82	0	0	0	0	0	0	6.5	136	75	3.8	0.51	31.4	64	84	0
83	1	0	0	0	0	1	6	114	70	5.3	1.39	25.1	90	111	0
84	0	0	0	0	1	0	5.7	133	82	5.6	0.89	34.8	40	94	0
85	1	0	0	1	0	0	5.9	107	69	4.9	1.38	22.7	88	75	0
86	0	0	0	0	1	1	7.6	140	92	3.9	1.83	33.4	64	96	1
88	0	0	0	0	1	1	6	138	83	3.6	0.55	27	82	99	0
89	0	1	0	0	1	0	8.3	167	95	5.4	1.26	30.5	76	51	1
90	0	0	0	0	0	1	6.1	125	74	4.4	0.97	24.7	48	84	0
91	1	0	1	1	1	1	7.2	122	71	2.8	0.38	28	91	106	0
92	0	1	0	0	1	1	11.6	144	82	6.9	1.55	48.8	45	100	0
93	1	1	0	1	1	1	9.4	119	60	3.7	1.98	29.2	82	86	1
94	1	0	0	0	1	1	7	149	95	4.9	0.58	39.3	99	99	0
95	0	1	0	0	0	1	5.86	111	66	4.2	3.39	41.2	69	68	0
96	0	0	0	0	1	1	5.08	140	67	4.4	0.87	36.8	45	63	1
97	0	0	0	0	0	1	5.6	127	69	4.6	0.54	27.7	39	76	0
98	0	0	0	0	1	1	6	125	64	5.5	0.84	31.7	59	98	0
99	0	0	0	0	1	0	4.91	142	90	4	0.57	26.3	59	100	0
100	1	0	0	0	1	1	7	135	84	5.5	1.56	31.3	99	55	1
101	0	0	0	0	0	1	5.9	100	60	6.6	0.53	32.6	51	85	0
102	1	0	1	1	1	1	7.5	150	60	4.6	3.42	32.3	102	29	1
103	0	0	0	0	1	1	6.1	139	85	6.8	0.78	29.9	51	28	0
104	0	0	0	0	0	1	6.2	129	82	5.6	1.04	35.3	50	95	0
105	0	0	0	0	1	1	5.7	122	76	4.5	0.9	23.9	62	96	0
106	1	0	0	0	1	0	7	132	62	6.3	0.77	29.8	65	100	0
107	1	0	0	1	1	1	5.7	142	80	3.4	0.58	27.1	73	87	0
108	0	0	0	0	1	1	5.6	131	64	5.3	0.58	25	50	108	0
109	1	0	0	0	1	1	6.2	132	89	6.7	1	30.7	79	77	0
110	0	0	0	0	1	1	5.9	127	74	4.6	2.52	34.2	44	89	0
111	1	1	0	0	1	1	11.9	134	83	3.8	0.48	39.7	46	102	0
112	0	0	0	0	0	1	5.8	144	95	4.5	0.7	27	66	100	0
113	1	0	1	1	1	1	5.7	125	78	3.6	0.76	28.1	100	51	1
114	1	0	0	1	1	1	6.8	118	75	4.3	1.06	24.2	73	81	0
115	1	1	0	1	1	1	6.7	151	85	5.3	0.76	24.3	45	73	0
116	0	0	0	0	0	1	5.8	119	79	4.9	1.29	30.9	41	107	0
117	0	0	1	0	1	1	6.87	132	66	3	1.07	36.9	73	30	1
118	0	0	0	0	0	0	5.4	129	73	5	1.2	26	31	89	0
119	1	0	1	0	1	0	6	152	84	5.8	1.16	23.8	80	91	0
120	0	0	0	0	1	1	6.4	137	77	7.1	1.06	26.8	62	101	0
121	0	1	0	0	1	1	7.1	132	69	5.8	1.91	30.4	82	43	1
122	0	0	0	0	1	0	5.9	113	77	6	1.18	27.5	45	93	0
123	1	0	0	0	1	1	6	134	81	4.5	1.13	32.5	95	102	0
125	0	0	0	0	0	1	6.2	109	76	6.3	0.91	29.6	51	70	0
127	1	0	1	0	0	1	5.2	141	68	5.3	1.1	23	69	101	0
128	0	0	0	0	1	1	6.9	130	83	5.3	0.62	26.7	65	103	0
129	0	0	1	0	1	1	5.9	120	67	4.8	0.71	25	49	73	0
131	0	0	0	0	1	0	5.4	123	81	5.8	1.62	32.7	52	94	0
132	1	1	0	0	0	0	8.4	117	68	3.7	1.34	29.4	101	94	0
134	0	0	0	0	1	0	5.7	133	78	5.2	0.84	38.7	62	86	0
135	0	1	0	0	1	1	6.3	126	78	3.7	0.9	29.2	53	91	0
136	0	1	1	0	1	0	6.2	140	92	4.9	1.47	40	73	95	0
137	0	1	0	0	1	1	7.2	128	71	5.9	2.1	33.2	33	100	0
138	0	0	0	0	0	0	5.7	113	60	4.2	0.82	26.5	59	76	0
139	0	0	0	0	1	1	6.2	104	67	4.8	2.08	29.9	27	102	0
140	0	0	0	0	0	0	5.7	129	66	6.4	0.67	27	60	101	0
141	1	0	0	0	1	0	5.4	132	85	3.9	0.85	28.2	73	88	0
142	0	1	1	0	1	0	11.5	146	78	5.3	2.27	29.7	52	86	0
143	0	1	0	0	1	0	5.8	109	60	3.6	0.7	24.4	56	101	0
144	0	0	0	0	1	0	6.1	137	81	5.6	0.98	26.5	52	99	0
145	0	0	0	0	1	1	5.9	132	88	6	1.49	56.8	56	83	0
146	0	0	0	0	0	0	5.1	124	75	5.6	0.78	31.7	50	94	0
147	0	0	0	0	1	1	6.6	123	77	4.4	0.49	26	65	92	0
148	0	0	0	0	0	0	5.4	127	89	5	1.06	27.7	55	89	0
149	1	1	0	1	1	1	7.5	123	64	5.2	0.9	25	77	88	0
150	1	0	0	0	1	1	4.9	147	96	3.5	1	26.7	70	99	0
151	1	1	1	0	1	1	8.1	130	66	2.9	0.78	36.8	98	98	0
152	0	0	0	0	0	1	5.6	130	79	4.3	1.52	31.1	59	105	0
153	0	0	0	0	1	0	5.8	136	88	3.8	1.24	37.4	70	93	0
154	0	0	0	0	1	1	5.7	144	88	5.8	0.57	26.4	53	100	0
155	0	0	0	0	1	1	5.91	146	82	3.9	1.02	49.1	47	99	0
156	1	1	1	0	1	1	7.7	162	98	5.1	0.74	31.2	74	101	0
158	0	1	0	0	1	1	7.1	156	80	6.3	1.25	32.7	74	105	0
159	0	0	0	0	1	1	6.7	166	87	5.5	0.91	35.2	64	98	0
160	1	0	0	1	1	1	5.3	121	82	5.3	0.76	36.9	91	90	0
161	0	0	0	0	1	0	5.6	162	99	5.8	0.34	37.5	59	81	0
162	1	0	0	0	1	1	6.3	128	70	5.4	1.8	24.7	103	73	0
163	1	0	0	0	0	1	5.9	118	65	3.2	2.05	32.7	75	106	0
164	1	0	0	0	1	1	6.6	116	71	6.3	1.04	32.7	105	97	0
165	0	0	0	0	0	0	5.9	100	65	5.6	0.98	35.4	57	94	0
166	0	1	0	0	1	0	8.4	122	75	4.9	1.55	27.3	49	90	0
167	1	1	1	0	1	1	10.9	126	72	4.4	2.91	22.7	88	66	1
168	0	1	0	0	0	1	5	113	79	3.6	1.3	27.4	48	91	0
169	0	0	0	0	1	0	6.1	114	53	5.7	1.45	33.1	66	94	0
170	1	0	0	1	0	1	6.1	156	82	6.7	2.37	30	72	92	0
171	0	0	0	0	1	0	5.1	135	77	4.4	0.84	31.7	56	99	0
172	1	0	0	1	0	0	6	120	79	5.8	0.5	33.9	61	63	0
173	0	1	0	0	1	1	6.2	158	82	5	0.96	37.7	68	71	1
174	0	0	0	0	0	1	5.7	122	79	3.6	0.77	38.5	59	101	0
175	0	0	0	0	1	1	6.1	139	76	4.9	1.43	31.2	59	99	0
176	0	0	0	0	0	1	5.4	129	75	4.3	0.67	38.9	48	37	0
177	0	0	1	0	1	1	6.9	149	75	3.7	1.13	25.8	59	92	0
178	0	0	0	0	1	1	5.6	133	80	4.4	0.39	30.7	49	104	0
179	1	0	0	0	1	1	6	118	78	3.5	0.47	24.1	94	93	0
180	0	0	0	0	1	0	5.8	135	87	5	0.6	31.4	81	95	0
181	0	1	0	0	1	0	9.3	135	75	4.9	1.12	28	52	70	0
184	1	0	1	0	1	1	4.3	114	65	3.8	0.86	30.1	57	92	0
185	0	1	1	0	1	1	8.5	145	82	2.9	0.89	26.6	38	42	1
186	0	0	0	1	1	0	5.5	165	99	5.8	1.68	30.5	42	96	0
187	0	1	0	0	1	1	6.6	118	71	6.4	1.48	29.3	55	108	0
188	0	0	0	0	1	0	5.5	144	94	9.3	1.88	37.2	58	96	0
189	0	0	0	0	1	0	5.8	133	80	5.2	0.55	34.8	59	98	0
190	1	0	0	0	1	1	5.2	123	78	3.1	0.79	27.4	75	100	0
191	1	0	0	0	1	1	5.9	150	90	3.6	0.82	31.6	93	102	0
192	0	0	0	0	1	1	7.1	142	75	5	0.93	30.7	53	87	0
193	1	0	1	0	0	0	6.2	126	80	4.5	0.57	26.6	87	91	0
194	0	0	0	0	0	0	5.3	121	68	4.4	0.54	27.2	45	108	0
195	0	0	0	0	1	0	6.2	155	90	6.4	1.09	32.7	59	88	0
196	0	0	0	0	0	1	4.88	127	83	5.7	1.52	29.3	46	67	0
197	0	0	0	0	1	1	6	156	81	5.2	2.05	41	62	104	0
198	0	0	0	0	0	0	5.9	115	73	3.9	1.45	28.2	50	97	0
199	1	0	0	0	1	1	6	140	81	5.2	0.67	33.4	68	103	0
200	0	0	0	0	0	0	5.2	122	76	4.8	0.6	29.9	37	98	0
201	0	0	1	0	1	1	6	99	55	6.3	0.4	27.6	54	75	0
202	1	0	0	1	1	0	4.6	136	94	4.8	1.64	26.4	67	92	0
203	0	0	0	0	1	0	6.4	123	83	5.3	1.45	32.4	71	39	0
204	0	0	0	0	0	0	6	106	57	6.5	1.97	28.7	40	95	0
205	1	0	1	1	1	1	6.2	111	84	4	1.6	30.8	80	102	0
206	0	0	0	0	1	1	5	131	71	5.3	3.06	29.4	57	48	0
208	0	0	0	0	1	1	3.9	121	71	3.6	1.52	29.1	60	95	0
209	1	0	0	1	1	0	7.6	152	90	4.2	1.23	51.8	63	80	1
210	0	0	0	0	1	1	6.9	144	87	6.1	1.44	42.4	41	103	0
211	0	0	0	0	0	1	6.5	129	77	6.7	0.75	27.7	49	92	0
212	0	0	0	0	0	0	5.8	126	86	4.9	1.37	31.9	54	86	0
213	0	0	0	0	1	0	4.56	117	69	4.5	0.77	26	35	105	0
214	0	0	0	0	1	1	5.8	122	68	5.1	1.01	29.5	63	99	0
215	0	0	0	0	1	1	6	122	66	7.3	0.65	37.7	43	107	0
216	0	0	0	0	0	0	5	114	77	6.1	1.16	29.2	60	85	0
218	0	0	0	0	1	1	6.86	136	61	5.7	1.25	30	66	33	0
219	0	1	0	0	1	1	7.7	165	98	5.3	2.08	31.6	48	88	0
220	0	1	0	0	1	0	8.37	174	92	4.4	0.5	45	51	64	1
221	0	0	0	0	1	1	6.54	146	78	4.7	0.99	26.9	54	57	0
222	1	0	0	0	1	0	5.2	141	92	4.2	0.82	26.7	111	94	0
224	0	0	0	0	0	1	6.8	129	81	5.7	1.16	31.4	47	101	0
225	0	0	0	0	0	0	5.6	120	70	5.5	0.81	35.9	52	93	0
226	1	0	0	1	1	1	5.1	171	107	5	1.17	25.1	69	33	0
227	0	1	0	0	1	1	5.9	142	80	6.7	1.75	28.5	43	89	0
228	0	0	0	0	0	0	5.3	146	81	4.1	0.39	23.5	66	99	0
229	1	1	0	0	1	0	7.3	133	84	4.7	1.52	31.7	86	15	1
230	0	0	0	0	0	0	5.5	134	74	4.8	0.79	26.3	47	73	0
232	0	0	0	0	0	0	5.4	100	95	5.6	0.79	29.7	49	101	0
233	0	0	0	0	0	1	6.5	100	58	6.4	0.56	24.6	53	100	0
234	1	0	0	0	0	0	5.7	132	78	4.6	2.8	34.1	53	89	0
237	1	0	0	0	0	0	4.2	122	69	4.8	0.98	21.9	70	101	0
238	0	0	0	0	0	0	6.2	128	68	7.5	1.87	24.3	41	94	0
243	1	1	0	0	1	1	11.7	118	69	4.7	0.6	23.1	78	100	0
245	0	1	1	0	1	0	5.9	150	80	3.3	0.41	22.6	66	94	0
246	0	1	0	0	1	1	6.8	103	66	5.5	1.84	31.7	59	77	1
247	1	1	0	0	1	0	5.4	135	88	4.43	0.85	24.5	81.9	47	0
248	0	1	0	0	1	1	13	148	94	5.9	2.96	42.4	44	98	0
249	0	1	0	0	0	1	10.2	116	68	5.9	1.35	21	38	93	0
252	1	1	1	0	1	1	7.5	150	73	4.9	1.02	25.8	88	8	1
253	0	1	0	0	1	0	6.73	128	73	4.3	1.34	44.6	58	97	0
254	0	0	0	0	0	0	5.5	128	72	4.5	0.8	33.9	49	66	0
255	1	0	0	0	0	0	5.81	145	92	5.1	4.24	34.3	61	99	0
257	1	0	0	0	1	0	5.1	121	68	4.8	0.74	21.6	68	90	0
258	0	1	0	0	1	1	6.08	129	72	5	0.59	26.9	53	92	0
260	1	0	0	0	0	0	6.1	150	88	5.7	1.11	27.8	66	83	0
261	1	0	0	0	1	1	6.3	123	82	5	2.31	27.3	85	87	0
263	1	1	1	0	1	1	6.1	120	80	3	1.04	26.7	6	88	0
265	1	0	0	1	0	0	5.8	105	62	5.5	0.53	35.4	76	107	0
266	1	1	0	0	1	1	7.59	122	67	4.5	1.87	28.4	71	105	0
267	0	0	0	0	0	0	5.5	100	73	5.7	1.11	24.7	49	95	0
268	0	0	0	0	1	0	6.4	140	80	4.6	2.62	27.6	48	59	0
269	1	1	1	0	1	1	8	133	75	3.5	1.09	30.4	95	7	1
270	1	0	0	0	1	0	5.1	131	85	4.8	1.96	30.5	76	89	0
271	0	0	0	0	0	0	5.9	123	71	2.9	1.32	24.4	43	86	0
272	0	0	1	0	0	0	6	124	53	5.8	1.54	30.4	77	93	0
273	1	1	0	0	1	1	6.5	122	65	4.3	1	28.3	99	2	1
274	0	0	0	0	1	1	6.5	142	86	4.6	1.16	32.1	65	85	0
275	1	0	0	0	1	0	6.3	123	77	5.1	2.12	25.3	88	99	0
276	0	0	0	0	0	0	5.9	132	73	5.7	0.97	28.8	41	46	0
277	0	1	0	0	0	0	9.6	142	84	5.2	2.51	33.3	77	49	1
278	0	1	0	0	1	1	8.5	139	79	3.5	0.52	21.2	63	73	0
283	1	1	0	1	0	1	8.2	120	72	6.5	1.41	28.4	74	89	0
286	0	0	0	0	0	0	5.8	122	79	5.9	0.71	31.6	72	78	0
288	0	1	0	0	1	1	5.57	133	85	5.5	2.65	32.9	58	8	0
289	1	0	1	0	1	1	5	120	67	5.9	1.39	22.5	71	94	0
290	0	1	0	0	1	1	8.3	162	89	3.7	1.05	29.6	63	100	0
292	0	0	0	0	0	0	6.43	110	75	3.8	0.81	26.9	63	101	0
293	1	1	0	1	1	1	6.2	136	81	5.9	3.21	23.6	81	93	0
294	1	1	0	0	1	0	9.3	155	102	5.9	1.13	30.7	69	102	0
295	0	0	0	0	1	1	6.55	147	79	5.9	0.91	32.9	43	102	0
296	1	1	1	0	1	1	6.2	120	76	2.96	0.97	27.4	85	107	0
298	1	1	0	0	1	1	9.5	133	85	3.5	0.5	34.9	79	54	0
300	1	0	0	0	1	0	6.4	177	96	5.1	0.46	27.6	107	53	0
301	0	0	1	0	1	1	5.6	118	65	2.56	0.73	24.5	50	101	0
302	0	0	0	0	1	0	5.9	137	82	5.1	2.01	29.5	69	90	0
303	0	1	0	0	1	1	10.3	127	69	4.8	1.66	41.7	50	101	0
304	1	1	1	0	1	1	9.1	154	72	6	2.44	29.3	76	96	0
305	0	0	0	0	0	1	7.4	112	62	6.5	4.31	32	73	103	0
308	0	0	0	0	0	0	5.9	123	69	6.7	1.21	36.2	46	100	0
309	0	0	0	0	0	1	6.7	122	78	3.4	1.38	44.1	31	90	0
310	1	1	1	0	1	0	5.8	129	75	4.1	1.36	25.8	74	103	0
311	0	0	0	0	0	0	6.2	120	70	4.5	3.75	46.6	55	88	0
312	0	0	0	0	0	0	5.2	132	78	4.2	0.83	30.3	29	82	0
314	0	1	0	0	1	0	6.8	136	83	5.7	3.14	33.3	48	104	0
315	0	1	0	0	0	1	9.5	142	83	7	0.63	31.9	45	98	0
316	1	0	0	0	0	0	7	130	65	5.1	3.18	28.5	61	100	0
317	1	1	0	0	1	1	6.9	131	74	4.3	0.82	29	71	100	0
319	0	0	0	0	0	0	5.5	126	89	5	0.63	25.4	68	94	0
320	1	1	1	1	1	1	8.5	121	58	3.9	1.81	33.8	109	10	1
321	1	1	0	0	1	1	8.84	137	70	4.5	0.87	30	52	17	0
323	0	1	0	0	0	1	8.3	130	76	5.9	1.66	25.5	47	98	0
324	0	0	1	0	1	1	6	153	82	4.2	1.3	26.8	65	65	0
325	0	1	0	0	1	0	6.9	110	70	5	1.41	33.2	52	84	0
328	0	0	0	0	1	1	7	145	79	5.6	1	21	62	105	0
329	0	0	0	0	1	1	6	144	83	6.4	1.84	31.9	69	50	0
330	0	0	0	0	0	0	5.8	135	76	5.4	0.83	23.9	60	92	0
332	0	0	0	0	1	1	9.5	167	96	6.2	1.68	31.6	62	88	0
333	0	0	0	0	1	1	6.9	126	66	6.8	1.94	33.3	57	101	0
334	1	0	0	0	0	0	5.9	133	74	6.7	1.78	28	83	95	0
335	1	0	0	0	0	0	5.81	140	90	5.2	0.86	22	71	99	0
336	0	0	1	1	1	1	5.3	134	71	4.7	2.01	35.6	68	104	0
337	1	1	0	0	1	1	9	114	59	4.5	1.19	24.5	85	49	1
338	0	0	1	0	1	0	6.1	123	61	5	0.92	30.7	40	82	0
340	0	0	0	0	0	0	5.5	100	64	3.7	0.38	25.4	51	93	0
341	1	1	0	0	1	1	7.5	110	62	4.6	1.66	25.2	54	95	0
343	0	1	0	0	1	1	9.1	107	62	5.7	3.48	33.8	77	88	1
344	0	1	0	0	1	0	9.4	135	78	5	0.67	43.6	43	96	0
345	0	1	0	0	1	1	11.6	118	80	4.3	1.27	28.4	53	105	0
346	1	1	0	0	1	1	10.4	128	70	5	2.16	33.2	92	105	0
347	1	0	0	0	1	0	5.4	134	92	6.1	2.18	33.6	83	104	0
349	0	1	0	0	1	1	6.96	123	61	7.4	1.11	27.1	66	104	0
351	0	0	0	0	1	0	5.9	145	69	5.5	1.09	38	45	106	0
353	0	0	0	0	0	0	5	120	68	4.5	1.55	37.4	71	59	0
354	0	1	0	0	1	1	10.6	151	89	3.4	0.84	40.9	64	100	0
356	0	1	0	0	1	1	12.7	159	85	3.8	1.73	31.4	63	51	1
357	0	0	0	0	0	0	6.4	126	74	6.05	0.82	23.6	77	109	0
360	0	1	0	0	1	1	6	132	70	2.9	0.73	30.7	56	97	0
361	1	0	0	0	0	0	5.3	144	58	5.3	1.93	24.2	86	11	1
362	0	0	0	0	1	1	6.1	133	84	3.3	1.66	27.5	43	104	0
365	1	1	0	0	1	1	9.6	144	86	2.6	1.13	29.8	110	16	1
368	0	0	0	0	1	1	6	137	77	7.2	1.03	42.6	59	100	0
369	1	1	0	1	1	1	11.25	165	112	6.3	1.32	34.8	101	73	0
370	0	0	0	0	1	1	5.32	138	90	3.7	0.71	30.9	57	104	0
372	1	0	0	0	1	1	4.86	119	81	5.1	0.66	24.4	99	106	0
373	1	1	0	0	1	0	9.5	132	84	4.3	0.82	24.7	77	107	0
375	1	1	1	0	1	1	12.38	151	80	4.9	1.79	30.8	102	21	1
376	0	1	0	0	0	0	6.2	121	65	4.86	0.44	27	42	96	0
377	0	0	0	0	0	0	6.4	122	46	6.2	0.69	30.3	53	90	0
381	1	0	0	1	1	0	5.2	139	86	3.8	1.81	21	85	107	0
383	0	0	0	0	1	1	5.6	134	62	4	1.23	22.8	83	93	1
384	1	0	1	0	1	0	5.7	103	72	3	0.68	28.2	83	83	0
385	0	1	0	0	0	0	6.5	149	65	4.3	1.3	33.3	74	49	1
387	0	1	1	0	1	1	6.65	124	82	4.1	1.64	25.9	74	107	0
388	0	0	0	0	0	0	5.8	117	63	6.3	0.69	32.2	70	78	0
390	0	0	0	0	1	1	5.5	141	80	4.7	1.44	41.6	49	112	0
391	1	1	1	0	1	1	7.6	122	66	2.8	1.04	16.1	100	5	0
392	0	1	0	0	1	1	7.28	173	100	4.5	0.74	31.8	70	98	0
393	0	0	0	0	0	0	5.4	150	80	5.8	0.66	27.8	70	105	0
394	0	1	0	0	0	1	6.1	107	68	4.5	0.67	31.4	74	80	1
395	0	1	0	0	1	1	7.7	136	91	7.5	0.94	31.2	67	98	0
396	0	0	0	0	0	0	5.8	132	85	5.4	1.43	27.7	46	81	0
397	0	0	1	0	1	1	6.6	139	76	4.2	1.22	35.2	68	24	1
398	0	1	0	0	1	1	6.2	164	62	5.9	1.6	31	72	106	0
399	0	0	0	0	0	0	5.4	110	66	6.1	1.3	27.6	61	100	0
400	1	1	0	0	1	1	6.69	131	76	4.3	1.26	35.1	49	89	0
402	0	1	0	0	1	1	5.1	152	86	4.2	1.05	39.7	51	106	0
404	0	1	0	0	1	1	5.7	121	83	3.5	1.59	28.4	66	108	0
406	0	0	0	0	1	0	4.9	142	77	5.1	0.9	36	47	98	0
407	1	1	0	0	1	1	7.42	139	61	3.9	0.89	25.3	79	107	0
408	0	0	0	0	1	0	6.3	141	96	5.8	1.35	31	59.3	96	0
409	1	1	1	0	1	1	7.4	145	89	4.7	1.71	23.1	72	109	0
410	0	1	0	0	1	1	6.52	126	71	3.8	0.98	40.2	64	108	0
411	0	1	0	0	1	1	7.1	152	81	3.7	2.27	30.4	67	94	0
412	0	0	0	0	1	1	6.6	140	78	3.1	1.01	36.3	64	84	0
414	1	0	0	1	0	0	4.7	122	79	4.4	1.31	24.4	60	88	0
415	0	1	1	0	1	1	7.6	138	65	4.1	1.43	21.2	85	95	0
416	0	1	0	0	1	1	11	131	76	7.1	2.75	42.5	63	87	1
417	1	1	0	0	0	0	13.2	117	62	5.8	0.81	26.9	64	56	0
418	0	1	1	0	1	1	8.7	130	69	4.2	1.75	30	61	105	0
420	0	0	0	0	0	0	5.1	121	77	4.3	0.85	33.3	41	104	0
423	1	0	0	1	0	0	6.3	128	72	5.8	0.76	31	81	92	0
424	1	1	1	0	1	1	7.9	140	90	3.97	1.11	30.9	113	8	1
425	1	0	0	1	0	1	5.7	121	79	6.4	2.2	30.3	85	9	0
426	0	0	0	0	0	0	5.7	121	74	6.5	2.96	29.2	63	90	0
427	0	0	0	0	0	1	6.2	124	54	6	1.21	25.8	55	80	0
429	1	0	0	0	0	0	5.7	114	57	3.8	2.49	34.6	54	86	0
431	0	1	0	0	1	1	8.8	144	66	6	0.84	32.2	60	75	1
432	0	1	0	0	1	1	7.4	164	93	5.9	1.28	29.7	39	96	0
433	0	0	0	0	1	0	6.5	167	88	4.6	0.84	49.5	58	68	0
435	1	0	0	0	1	1	6.1	126	77	5	0.28	26	63	91	0
436	0	0	0	0	1	1	5.9	153	69	5.7	1.79	26	75	43	0
438	0	0	0	0	0	1	5.9	122	74	4.8	0.66	34	53	105	0
442	1	0	0	0	0	0	6	140	76	4.1	0.57	38	67	108	0
443	1	0	0	0	0	1	5.2	127	87	5.9	0.84	28.1	71	97	0
444	1	0	0	0	0	0	5.3	118	71	6.7	1.49	34.2	84	107	0
445	1	1	0	1	0	1	10.7	132	86	6.4	2.11	52.4	64	84	0
446	1	0	0	0	0	0	6	137	95	4.3	0.58	30.8	86	105	0
447	1	1	1	1	1	1	10.76	140	80	3	1	31.6	75	34	0
448	1	1	1	1	0	1	7.1	138	65	3.5	1.04	25.6	76	96	1
450	0	0	0	0	0	0	4.9	115	82	3.8	0.37	34.5	50	97	0
451	0	0	0	0	0	0	5.7	114	67	4.5	1.05	15.4	56	26	0
453	0	0	0	0	0	0	5.7	112	70	4	0.5	21	52	71	0
454	0	1	1	0	1	1	11.6	182	99	11.4	4.78	35.7	89	28	0
455	0	1	0	0	0	0	7.3	108	70	2.9	0.75	36.6	51	111	0
456	1	0	0	0	0	0	6.7	126	62	5	0.89	24.4	86	87	0
457	0	0	0	0	0	1	6.2	118	64	5.9	2.76	32.5	69	80	1
458	0	0	0	0	0	0	4.2	130	74	4.4	0.44	25.8	56	87	0
459	1	1	0	0	1	1	8.15	137	96	4.9	1.62	32.4	76	97	1
461	0	0	0	0	0	1	4.9	137	89	6.3	5.88	33.6	49	98	0
462	0	0	0	0	0	0	6	122	76	6	1.07	40.2	60	62	0
463	0	1	1	0	1	1	13.79	162	70	6	2.28	39	68	79	1
465	1	0	0	1	1	1	5.1	131	72	6.1	3.46	28.7	72	101	0
466	0	0	0	0	1	1	6.5	143	78	5.1	3.11	33.3	61	92	0
467	0	1	0	0	1	1	6.7	152	83	4.8	1.97	38.6	38	100	0
468	0	0	0	0	0	0	5.8	100	62	4.8	0.87	29.1	49	97	0
469	0	0	0	0	0	0	6.8	125	88	5.2	0.56	26.9	62	79	0
470	0	0	0	0	0	1	6.2	114	66	6.4	2.75	34.2	48	99	0
471	0	1	0	0	0	1	5.5	144	77	6.6	1.8	30.2	41	105	0
475	0	0	0	0	1	0	6	130	90	6.1	1.1	39.6	65	110	0
477	0	0	1	0	1	1	6.1	110	57	3.9	2.17	29.9	63	77	1
478	0	0	0	0	0	0	5.3	105	80	4.8	1.05	22.3	34	11	0
479	0	0	1	0	1	1	6.4	135	79	6.1	1.23	17.7	75	5	1
480	1	1	0	0	0	1	4.44	128	81	3.5	0.91	24.7	81	59	0
482	0	0	0	0	0	1	5.78	115	75	5.2	1.55	35.6	73	112	0
486	0	0	0	0	0	0	5.5	135	91	5.4	0.89	32.3	53.5	16	0
487	1	1	0	0	1	0	7	158	67	3.8	0.63	22.9	64	83	0
488	0	0	0	0	0	0	5.2	104	68	3.5	0.61	25.2	50	93	0
490	1	0	0	0	1	1	4.88	124	72	5.3	1.12	32	69	56	0
491	0	0	0	0	0	0	6.1	104	61	6	0.84	35.7	60	59	0
493	1	0	0	0	0	1	6.1	124	71	4.4	0.89	26.7	71	102	0
495	1	0	0	0	0	0	4.8	136	67	5.3	0.75	37	101	75	0
496	1	1	0	0	1	1	7	115	62	4.3	1.4	26.6	103	3	1
497	0	1	0	0	1	1	10.4	130	80	6.5	0.85	21.5	55	53	0
498	0	0	0	0	1	0	5.7	134	85	4.35	0.8	32	52	49	0
500	1	0	0	0	1	0	7.3	132	91	4.8	1.45	29.9	97	99	0
502	0	0	0	0	0	0	5.5	131	77	5.4	2.54	42.7	47	58	0
503	0	1	0	0	1	1	6.3	143	85	8.1	1.13	33.9	58	109	0
504	0	0	0	0	0	0	5.1	97	62	6.6	1.93	22.5	46	109	0
506	0	0	0	0	1	0	5.2	114	72	5.1	1.16	15	52	105	0
507	0	1	0	0	1	1	6.2	166	53	4.3	0.62	27.4	61	107	1
508	0	0	0	0	0	0	5.2	111	68	5.3	1.03	29.7	61	111	0
509	0	1	0	0	1	0	6.6	93	64	4.8	1.9	32.5	68	80	1
511	0	0	0	0	0	0	4.8	118	86	5.1	0.55	24.7	47	100	0
512	0	0	0	0	0	0	5.5	100	68	4.4	1.24	37.8	50	76	0
513	0	1	1	0	1	1	11.8	150	72	7.1	0.72	25.1	91	34	1
515	0	1	0	0	1	1	6.6	127	71	5.8	1.61	26.9	59	111	0
518	1	0	0	0	0	0	4.9	150	80	5.4	0.22	30.5	85	87	0
519	0	0	0	0	1	0	6.6	125	80	3.2	0.9	32	48	86	0
520	0	1	1	0	1	1	7.47	109	60	3.2	0.75	26.9	66	82	1
523	0	1	0	0	1	1	10.8	120	77	11.3	10.8	29.7	71	84	0
524	0	0	0	0	1	0	5.5	149	87	4.4	0.39	22.2	65	96	1
525	1	1	0	1	1	0	18.1	138	80	8	2.72	23.5	94	17	1
528	0	0	1	0	1	1	7.4	140	78	5.6	1.32	32	72	109	0
529	0	0	0	0	0	0	4.7	97	70	4.8	1.01	32	60	5	0
530	1	0	0	0	1	1	6.1	148	83	3.8	0.9	30.4	86	95	0
531	0	1	0	0	1	1	6.8	146	74	4.7	0.69	31.7	49	109	0
532	0	1	0	0	1	0	6.32	134	77	4.3	1.1	56	60	98	0
534	0	1	0	0	1	1	7.7	124	65	4.2	1.19	37.2	78	110	0
535	0	1	0	0	1	1	7	104	59	3.7	2.32	25.4	37	108	0
536	0	1	0	0	1	1	11.1	162	86	5.3	1.05	26.8	60	98	0
538	1	0	0	0	0	0	6.6	136	85	3.9	0.9	31.6	75	98	0
541	0	1	1	0	0	1	6.67	104	56	4.3	1.22	28.5	66	107	0
542	0	0	0	0	0	0	5.7	119	73	3.4	0.24	22.9	54	71	0
543	0	0	0	0	0	0	5.7	111	62	4.3	0.94	26.3	54	44	0
545	0	0	0	0	1	0	4.8	166	101	5.5	1.53	24.8	43.2	107	0
546	0	1	0	0	1	1	9.8	156	86	4.1	1.38	52	53	77	0
547	0	0	0	0	1	0	4.52	136	86	4.7	0.92	25.8	54	112	0
548	0	0	0	0	0	1	6	143	81	6.6	0.59	34	59	95	0
549	0	0	0	0	1	0	5.1	108	73	3.6	0.75	28.5	48	94	0
551	0	0	0	0	0	0	4.7	130	66	5.8	0.76	31.3	58	112	0
552	0	0	0	0	1	1	5.8	136	79	6.5	1.13	30.3	59	111	0
553	1	0	0	1	0	0	5.4	109	57	3.7	0.68	24.2	59	99	0
554	0	0	0	0	0	0	5.8	113	61	4.8	0.53	24.5	48	64	0
555	0	0	0	0	0	0	4.3	104	54	5	1.3	25.4	60	75	0
557	0	1	0	0	0	1	7	122	81	6	1.16	29.3	35	97	0
558	0	0	0	0	0	0	5.7	120	72	4.6	2.29	36.1	60	92	0
559	0	0	0	0	0	0	5.4	137	75	4.2	0.59	26.6	32	88	0
560	0	1	0	0	1	1	8.7	168	92	5.6	0.91	32.5	49	103	0
564	0	0	0	0	1	1	5.5	121	86	4.1	0.76	38.1	56	94	0
565	0	0	0	0	1	0	5.5	116	64	5.74	0.47	40.2	47.1	72	0
566	1	0	0	0	0	0	6.4	153	90	5.2	0.83	27.5	63	27	0
567	0	1	0	0	1	1	11	136	93	6.3	1.62	36.6	50	100	0
568	0	1	0	0	0	1	9.2	134	62	8	1.75	26.8	59	25	0
569	0	0	0	0	1	0	5	108	95	4.8	1.47	26.2	38	113	0
570	0	0	0	0	0	0	5.1	113	73	5	0.58	25.6	54	90	0
571	0	0	0	0	0	0	6	124	73	4.5	0.66	27.2	51	90	0
572	0	0	0	0	1	0	7	122	73	3.5	0.65	26.1	42	59	0
573	0	0	0	0	0	0	6.4	101	68	4.41	0.46	27	58.8	69	0
575	0	0	0	0	0	1	6.3	150	70	4.8	1.4	31.2	56	103	0
577	0	1	0	0	1	0	5.9	145	95	5.1	0.69	44.5	46	88	0
579	1	1	0	1	1	1	5.9	168	94	6.5	0.95	31.2	98	53	0
581	1	0	0	0	1	0	6	176	108	6.4	1.18	24.1	65	91	0
589	1	0	1	0	1	1	7.1	132	77	3.1	0.57	31.8	96	111	0
591	1	0	0	0	1	1	5.97	110	63	2.9	0.66	27.4	86	53	1
593	1	1	0	0	1	0	12	130	84	5.1	6.24	35.4	57	90	0
596	1	1	0	0	1	0	7	159	85	5.4	1.44	30.3	55	69	0
604	1	0	0	1	0	0	5.3	105	60	4	0.75	32.4	71	96	0
607	1	0	0	0	0	1	6.4	117	60	5.4	1.9	23.3	92	102	0
609	1	0	0	0	0	0	5.7	134	86	5.7	0.72	24.1	78	106	0
620	1	1	1	0	1	1	8.5	131	82	5	1.62	32.1	90	49	0
621	1	0	0	0	1	0	6.5	139	69	5.1	0.79	24.6	71	108	0
624	1	0	0	1	0	0	5.7	119	89	6.2	2.95	41.7	94	92	0
628	1	0	0	0	0	0	5.9	135	69	7.3	1.09	25.8	51	92	0
633	1	1	0	0	1	1	7.6	164	85	4.1	1.02	27.6	77	104	0
635	1	0	0	0	1	1	5.2	116	74	4.5	1.85	26	86	97	0
637	1	1	1	1	1	1	5.83	157	90	4.8	1.6	24.3	91	13	1
638	1	0	0	0	0	0	6	122	74	4.5	0.73	34.1	65	97	0
642	1	0	0	1	0	0	5.6	111	75	5.5	1.87	45.8	71	35	0
647	1	0	1	0	1	0	6.7	130	76	6.1	2.21	27.8	96	91	0
673	1	1	0	0	1	0	8.8	130	80	5.7	1.02	38	68	94	0
686	1	1	1	0	1	1	8.8	123	67	4.8	0.91	35.8	78	85	0
689	1	0	0	0	0	0	6	108	70	5.1	2.59	27.6	91	80	0
696	1	1	0	0	1	1	7.46	153	82	5.4	1.34	23.8	75	92	0
706	1	0	0	0	0	0	6.2	123	77	4.6	1.26	41.8	87	82	0
713	1	1	0	0	1	0	5.8	140	83	3.95	0.63	37.4	61.9	24	0
714	1	1	0	1	1	1	12.8	129	69	5	1.68	23.4	89	100	0
716	1	0	0	0	1	0	5.5	125	75	5.2	0.91	30.8	95	94	0
718	1	0	0	0	1	0	6.1	116	68	5.8	0.97	26.3	107	101	0
719	1	1	0	0	1	1	7.5	114	88	5.2	2.02	29.9	106	45	0
720	1	0	0	1	0	0	6	118	79	5	3.05	45.6	82	48	0
722	1	0	0	0	0	0	5.2	108	66	5.7	2.32	26.7	64	64	0
725	1	1	0	0	1	1	7.1	142	89	6.6	2.83	31.7	92	51	1
726	1	1	1	0	1	1	10.79	119	41	4	3.21	29.8	88	113	0
727	1	0	0	1	0	0	6	161	83	5.7	2.98	33.5	88	97	0
735	1	0	0	0	0	0	6.2	134	74	5.8	0.86	21.3	101	22	1
739	1	1	1	0	0	1	7.5	124	82	4	1.18	26.8	73	81	0
751	1	0	0	1	1	1	6.1	133	81	6.2	1.23	22.1	69	75	0
752	1	1	1	0	1	0	6.1	131	74	3.5	0.85	24.7	84	89	0
755	1	0	0	1	1	1	7.4	163	110	5.7	1.49	38.8	97	78	0
757	1	0	0	0	0	0	4.1	122	77	2.9	1.41	28.1	66	84	0
758	1	0	0	1	1	0	6.1	156	71	5.74	1.19	32.2	69	108	0
759	1	0	0	0	0	0	5.7	118	74	4.1	0.51	27.1	70	39	0
761	1	0	0	0	0	0	5.3	116	76	5.3	1.19	28.9	59	107	0
764	1	1	0	0	1	1	10.1	143	92	3.8	1.38	32.7	78	104	0
768	1	0	0	1	0	0	4.9	139	66	5.2	1.52	29.2	113	88	0
771	1	0	0	0	0	1	5.2	121	78	5	0.71	26.9	76.3	105	0
774	1	0	1	1	1	1	6.8	139	79	4.6	2.31	25.2	91	44	0
777	1	0	0	0	0	0	5.6	122	78	3.9	0.5	22.6	59	78	0
782	1	0	0	1	0	0	5.6	112	77	5.52	2.08	28.7	62	109	0
783	1	1	1	0	1	1	8.8	162	101	5	0.6	23.2	75	43	1
785	1	0	0	1	0	1	7.6	109	74	6.7	2.74	24.1	94	105	0
791	1	1	1	0	1	1	6.34	148	90	4.3	0.56	21.1	71	107	0
794	1	0	0	0	1	0	4.9	134	83	5.8	0.78	30.5	66	99	0
795	1	1	0	1	1	1	5.66	140	67	3.1	0.59	23.9	96	15	0
806	1	0	0	0	0	0	6.2	121	76	5.9	0.57	22.9	74	106	0
812	1	0	0	0	1	0	4.6	134	73	4.2	0.75	27.3	81	91	0
813	1	0	0	0	0	0	5.6	146	88	4.3	0.61	30.5	67	93	0
821	1	0	0	0	0	0	5.5	128	81	4.8	1.01	30.7	79	84	0
843	1	0	0	1	0	0	5.5	136	93	6.3	1.62	52.4	63	93	0
845	1	1	1	1	0	0	13.5	139	77	2.9	2.45	21.2	81	15	1
846	1	1	0	0	1	1	5.5	120	69	4.4	1.57	33.2	80	93	0
851	1	0	0	1	0	0	5.5	150	88	5.2	0.94	25.4	60	73	0
852	1	1	0	1	0	0	8.4	136	78	4.7	1.08	29.5	47	96	0
853	1	0	0	1	0	0	5.7	112	68	4	0.6	22.8	57	91	0
855	1	0	0	0	1	1	6.8	120	68	3.9	2.46	33.5	75	111	1
864	1	0	0	0	0	0	4.7	148	87	4.92	1.8	26.1	81	99	0
869	1	1	1	1	1	1	14.9	164	83	6.2	1.76	27	95	94	1
874	1	1	0	0	0	1	6.96	106	64	3.3	0.62	30.4	64	107	0
882	1	0	0	1	1	0	5.7	120	74	4.5	1.45	17.5	88	46	0
886	1	0	1	0	1	1	6.7	92	54	2.4	0.44	28.5	106	82	1
889	1	0	0	1	0	0	5.7	119	88	6.2	2.81	29	68	95	0
897	1	1	1	0	1	0	7.2	134	69	4.6	1.2	23.5	92	108	0
903	1	0	1	0	1	1	6.2	142	88	5.3	1.3	32.3	67	105	0
907	1	1	0	1	1	1	5.7	137	81	2.4	0.85	25.1	78	91	0
911	1	0	0	0	0	0	5.2	122	72	4.5	0.65	29.1	63	99	0
917	1	1	0	0	1	1	5.01	110	60	6.2	1.32	39.1	76	18	0
925	1	1	1	1	1	1	10.3	157	79	3.7	1.09	31.5	103	26	1
926	1	1	0	1	1	0	6.6	130	88	5.2	1.13	52.5	81	88	0
928	1	1	0	0	0	1	8.1	136	88	5.8	0.5	27.7	80	64	0
931	1	1	1	0	1	1	7.43	153	61	4.4	1.07	23.2	96	4	1
952	1	0	1	1	1	1	6.7	145	70	4.7	0.6	21.2	64	105	0
954	1	0	0	0	0	0	4.8	136	79	4.4	0.62	21.2	97	52	0
956	1	0	0	0	1	1	6.2	126	82	4.2	0.72	32.2	104	93	0
962	1	0	0	0	0	0	6.1	150	112	5.9	1.33	33.2	67	94	0
968	1	0	0	0	0	0	4.3	121	55	2.23	0.66	21.2	65	106	0
976	1	0	0	0	0	0	5.4	140	87	3.6	1.63	43.6	70	70	0
978	1	1	1	0	1	1	13.5	170	85	5.3	1.38	27.9	78	24	0
981	1	1	0	1	1	1	8.3	138	68	4.3	1.65	41.3	57	70	0
991	1	0	1	0	1	0	6	139	87	3.5	0.43	13.7	57	12	0
992	1	0	0	0	1	0	5.7	161	99	6.8	5.53	46.6	91	93	0
993	1	0	1	0	1	1	5.9	131	79	2.8	0.8	29.9	86	111	0
994	1	1	0	1	0	0	10	143	80	5.5	1.22	30.8	95	68	1
996	1	1	1	1	1	1	9	140	81	4.8	1.49	31.5	59	99	0
1007	1	0	0	1	1	0	6.1	148	84	5.4	1.02	22.6	85	84	0
1014	1	0	0	1	0	0	6	126	71	4.9	0.99	28.1	72	89	0
1019	1	0	0	0	0	0	5.2	120	50	5.7	0.9	23.3	104	96	0
1020	1	0	1	0	1	1	6	158	101	7.9	1.48	23.9	76	103	0
1022	1	1	1	0	0	0	6.8	120	80	3.8	2.11	25.3	55	15	0
1023	1	0	0	0	1	0	4.58	149	89	4.9	1.17	29.6	74	108	0
1029	1	0	1	1	1	0	6.8	156	81	5	0.73	21.2	64	76	0
1040	1	1	0	1	0	0	10	181	93	5.8	0.99	29.9	72	77	0
1045	1	1	0	0	1	1	6.21	133	69	4.1	1.66	30.3	60	104	0
1058	1	0	0	0	1	0	5.9	143	92	6.3	2.26	28.2	81	87	0
1062	1	0	0	0	0	0	6.4	140	85	5.4	0.73	32.9	73	98	0
1070	1	0	0	1	1	1	6.3	135	90	5.2	1.64	31.6	77	111	0
1078	1	0	0	0	1	1	5.7	120	73	6.3	1.97	27.6	89	103	1
1079	1	0	0	0	0	0	5.6	128	80	7.7	4.27	23.9	79	91	0
1086	1	0	0	1	0	0	5.6	129	83	5.16	1.77	27.4	72	3	0
1094	1	1	0	0	0	0	9	96	53	5	1.16	25.3	54	25	0
1097	1	0	0	0	0	0	5.7	128	89	5.1	1.25	33.7	72	93	0
1103	1	0	0	0	0	0	6.5	147	87	4.5	3.38	26.5	76	27	0
1110	1	0	0	0	1	0	4.2	144	99	6.2	0.84	23.8	79	102	0
1111	1	1	0	0	1	0	10.1	202	148	8.4	11.56	47	138	13	0
1113	1	0	0	0	0	0	4.7	131	79	4.1	0.88	26	85	79	0
1116	1	0	1	0	1	0	5.1	113	72	2.5	0.41	29.3	91	75	0
1117	1	0	0	1	0	0	5.5	113	68	4.7	1.95	27.8	59	93	0
1140	1	0	0	0	1	1	6.3	133	90	5.4	1.66	24.3	57	104	0
1142	1	0	0	0	1	0	5.5	158	94	5.3	0.82	28.4	82	105	0
1149	1	0	0	0	0	0	5.6	130	79	4	0.77	25.5	107	24	0
1172	1	0	1	1	0	0	6	143	65	3.8	3.65	31.1	73	91	0
1173	1	0	0	0	1	0	5.6	134	93	5.4	0.65	28.4	84	67	0
1175	1	1	1	0	1	1	9.9	147	83	4.2	1.12	33.8	59	95	0
1176	1	1	0	0	1	1	7.3	126	72	4.3	1.02	35.1	7.3	109	0
1177	1	0	0	1	0	0	5.6	151	96	5.3	0.96	33.9	77	56	0
1178	1	0	0	0	0	0	5.3	128	85	6.3	1.47	28.4	73	81	0
1179	1	1	0	1	0	1	10.5	114	82	8.7	4.95	24.4	95	102	0
1187	1	0	0	0	0	0	5.2	103	70	4.1	0.81	29.7	69	37	0
1189	1	0	0	0	0	0	6.5	136	94	5.7	8.04	38.3	93	90	0
1192	1	1	0	0	0	0	14.6	127	43	8.9	1.86	36.3	81	7	0
1205	1	1	0	0	1	0	9.5	123	52	4.1	0.83	26.5	59	106	0
1210	1	0	0	0	0	0	5.8	127	69	5.1	0.79	25.9	72	107	0
1213	1	0	0	1	0	0	5.4	117	67	5.1	1.63	27.7	77	68	0
1214	1	0	0	1	1	0	6.6	119	81	4.5	1.3	30.3	72	103	0
1218	1	1	1	0	1	1	8.1	138	86	4.1	1.45	35.7	97	103	0
1226	1	0	0	0	0	0	4.9	143	84	4.5	1.36	29	74	84	0
1229	1	0	0	1	0	0	5.1	105	62	5.2	1.1	22	77	43	0
1239	1	0	0	0	0	0	6	146	93	4.9	1.1	34.9	80	104	0
1250	1	1	0	0	0	0	11.8	148	81	3.89	1.35	27.2	100.4	53	1
1252	1	0	0	0	0	0	5.2	140	80	4.9	3.56	23.3	70	91	0
1255	1	0	0	1	0	1	4.5	109	63	6.1	1.06	31.2	78	89	0
1258	1	0	0	0	1	1	6.96	138	74	6	0.93	29.4	102	83	1
1259	1	0	0	0	0	0	5.4	139	87	4.4	0.63	30.8	74	95	0
1264	1	0	0	0	1	1	5.49	164	93	6.8	0.57	36.3	80	105	0
1267	1	0	0	0	0	0	5.7	147	90	5.4	2.01	32.5	70	2	0
1268	1	0	0	0	0	0	5.9	140	79	2.5	0.79	25.7	90	93	0
1278	1	0	0	0	1	0	5.8	126	74	4.7	0.95	40.5	82	112	0
1287	1	0	0	0	0	0	6.7	102	74	5.2	1.6	29.2	66	61	0
1293	1	1	0	1	0	0	10.5	136	89	5.3	0.74	29.7	81	86	0
1299	1	0	0	0	0	0	5.5	122	74	6.1	0.79	22.4	100	92	0
1306	1	0	0	0	0	0	5.3	124	75	4.5	1.18	24.1	66	97	0
1311	1	1	0	0	1	0	10.9	125	89	5.9	1.3	19	54	90	0
1317	1	0	0	0	0	0	4.8	139	95	4.9	0.56	26.1	67	51	0
1322	1	0	0	0	0	1	6	120	59	5.8	1.74	25.4	74	92	0
1323	1	1	0	0	1	1	7.2	112	58	4.4	1.87	41.8	106	59	1
1324	1	1	1	1	1	1	6.1	116	79	3.9	2.51	23.1	55	81	0
1325	1	0	0	1	1	0	5.2	151	106	4.3	2.19	38.4	102	19	1
1328	1	0	0	0	0	0	5.4	119	68	5.3	0.79	26.1	58	108	0
1330	1	1	0	0	0	0	8.2	144	98	3.2	0.97	31.6	58	55	0
1331	1	0	0	1	0	0	5.3	117	54	4.8	1.14	24.9	86	82	0
1338	1	1	1	0	1	1	5.92	153	94	3.6	1.55	33.3	88	47	1
1343	1	1	0	0	1	1	12	152	85	6.2	2.94	28.7	63	17	0
1346	1	0	0	0	0	0	5.1	137	78	4.7	1.61	33.6	67	58	0
1351	1	0	0	0	0	0	5.3	111	67	4.9	1.12	26.2	83	13	0
1354	1	0	0	1	0	0	4.7	134	71	3.5	0.73	19.5	74	84	0
1356	1	0	0	1	0	0	5.8	125	77	3.7	0.33	25.2	82	91	0
